# Supplementary material
Source: ML conference proceedings conference paper supplement (https://openaccess.thecvf.com/content/ACCV2020/html/Xu_Fast_and_Differentiable_ACCV_2020_paper.html)
Supplement: Supplementary file 1 [file Xu_Fast_and_Differentiable_ACCV_2020_supplemental.ZIP]

# Fast and Differentiable Message Passing on Pairwise Markov Random Fields – Supplementary Material –

Zhiwei Xu<sup>1,2</sup>[0000–0001–8283–6095], Thalaiyasingam Ajanthan<sup>1</sup>[0000–0002–6431–0775],  
and Richard Hartley<sup>1</sup>[0000–0002–5005–0191]

<sup>1</sup> Australian National University and Australian Centre for Robotic Vision

<sup>2</sup> Data61, CSIRO, Canberra, Australia

{firstname.lastname}@anu.edu.au

## A Pseudocode of Backpropagation of ISGMR and TRWP

Due to the limited space of the main paper, we provide the pseudocode of backpropagation of ISGMR and TRWP in this appendix, in Algorithms 3-4 respectively.

---

### Algorithm 3: Backpropagation of ISGMR

---

**Input:** Partial energy parameters  $\{\theta_{i,j}\}$ , gradients of final costs  $\nabla \mathbf{c} = \{\nabla c_i(\lambda)\}$ , set of nodes  $\mathcal{V}$ , edges  $\mathcal{E}$ , directions  $\mathcal{R}$ , indices  $\{p_{k,i}^r(\lambda)\}$ ,  $\{q_{k,i}^r\}$ , iteration number  $K$ .  
We replace  $\nabla m^{r,k+1}$  by  $\nabla \hat{m}^r$  and  $\nabla m^{r,k}$  by  $\nabla m^r$  for simplicity.

**Output:** Gradients  $\{\nabla \theta_i, \nabla \theta_{i,j}(\cdot, \cdot)\}$ .

```

1  $\nabla \mathbf{m}^r \leftarrow \nabla \Theta_i \leftarrow \nabla \mathbf{c}, \nabla \Theta_{i,j} \leftarrow 0$                                  $\triangleright$ back Eq. (7)
2  $\nabla \hat{\mathbf{m}}^r \leftarrow \nabla \mathbf{m}^r$                                                      $\triangleright$ back message updates
3 for iteration  $k \in \{K, \dots, 1\}$  do
4      $\nabla \mathbf{m}^r \leftarrow 0$                                                          $\triangleright$ zero-out
5     forall directions  $r \in \mathcal{R}$  do                                             $\triangleright$ parallel
6         forall scanlines  $t$  in direction  $r$  do                                 $\triangleright$ parallel
7             for node  $i$  in scanline  $t$  do                                        $\triangleright$ sequential
8                  $\lambda^* \leftarrow q_{k,i}^r \in \mathcal{L}$                                  $\triangleright$ extract index
9                  $\nabla \hat{m}_i^r(\lambda^*) \leftarrow \sum_{\lambda \in \mathcal{L}} \nabla \hat{m}_i^r(\lambda)$              $\triangleright$ back Eq. (5)
10                for label  $\lambda \in \mathcal{L}$  do
11                     $\mu^* \leftarrow p_{k,i}^r(\lambda) \in \mathcal{L}$                          $\triangleright$ extract index
12                     $\nabla \theta_{i-r}(\mu^*) \leftarrow \nabla \hat{m}_i^r(\lambda)$                      $\triangleright$ back Eq. (9)
13                     $\nabla \hat{m}_{i-r}^r(\mu^*) \leftarrow \nabla \hat{m}_i^r(\lambda)$ 
14                     $\nabla m_{i-r}^d(\mu^*) \leftarrow \nabla \hat{m}_i^r(\lambda), \forall d \in \mathcal{R} \setminus \{r, r^-\}$ 
15                     $\nabla \theta_{i-r,i}(\mu^*, \lambda) \leftarrow \nabla \hat{m}_i^r(\lambda)$ 
16                 $\nabla \hat{\mathbf{m}}^r \leftarrow 0$                                              $\triangleright$ zero-out
17                 $\nabla \mathbf{m}^r \leftarrow \nabla \hat{\mathbf{m}}^r$                                      $\triangleright$ gather history gradients
18                 $\nabla \hat{\mathbf{m}}^r \leftarrow \nabla \mathbf{m}^r$                                  $\triangleright$ back message updates after iteration

```

---

**Algorithm 4:** Backpropagation of TRWP

---

**Input:** Partial energy parameters  $\{\theta_{i,j}\}$ , gradients of final costs  $\nabla \mathbf{c} = \{\nabla c_i(\lambda)\}$ , tree decomposition coefficients  $\{\rho_{i,j}\}$ , set of nodes  $\mathcal{V}$ , edges  $\mathcal{E}$ , directions  $\mathcal{R}$ , indices  $\{p_{k,i}^r(\lambda)\}$ ,  $\{q_{k,i}^r\}$ , iteration number  $K$ .

**Output:** Gradients  $\{\nabla \theta_i, \nabla \theta_{i,j}(\cdot, \cdot)\}$ .

```

1  $\nabla \mathbf{m}^r \leftarrow \nabla \Theta_i \leftarrow d\mathbf{c}, d\Theta_{i,j} \leftarrow 0$  ▷back Eq. (7)
2 for iteration  $k \in \{K, \dots, 1\}$  do
3   for direction  $r \in \mathcal{R}$  do ▷sequential
4     forall scanlines  $t$  in direction  $r$  do ▷parallel
5       for node  $i$  in scanline  $t$  do ▷sequential
6          $\lambda^* \leftarrow q_{k,i}^r \in \mathcal{L}$  ▷extract index
7          $\nabla m_i^r(\lambda^*) \leftarrow \sum_{\lambda \in \mathcal{L}} \nabla m_i^r(\lambda)$  ▷back Eq. (5)
8         for label  $\lambda \in \mathcal{L}$  do
9            $\mu^* \leftarrow p_{k,i}^r(\lambda) \in \mathcal{L}$  ▷extract index
10           $\nabla \theta_{i-r}(\mu^*) \leftarrow \rho_{i-r,i} \nabla m_i^r(\lambda)$  ▷back Eq. (11)
11           $\nabla m_{i-r}^d(\mu^*) \leftarrow \rho_{i-r,i} \nabla m_i^r(\lambda), \forall d \in \mathcal{R}$ 
12           $\nabla m_{i-r}^{r-}(\mu^*) \leftarrow \nabla m_i^r(\lambda)$ 
13           $\nabla \theta_{i-r,i}(\mu^*, \lambda) \leftarrow \nabla m_i^r(\lambda)$ 
14    $\nabla \mathbf{m}^r \leftarrow 0$  ▷zero-out

```

---

**B Maintaining Energy Function in Iterations**

With the same notations in Eq.(1) and Eq.(9) in the main paper, let a general energy function in a MRF defined as

$$E(\mathbf{x}|\Theta) = \sum_{i \in \mathcal{V}} \theta_i(x_i) + \sum_{(i,j) \in \mathcal{E}} \theta_{i,j}(x_i, x_j). \quad (14)$$

In the standard SGM and ISGMR, given a node  $i$  and an edge from nodes  $j$  to  $i$ , the message will be updated at  $k$ th iteration as follows,

$$m_i^{r,k+1}(\lambda) = \min_{\mu \in \mathcal{L}} (\theta_{i-r}(\mu) + \theta_{i-r,i}(\mu, \lambda) + m_{i-r}^{r,k+1}(\mu) + \sum_{d \in \mathcal{R} \setminus \{r, r^-\}} m_{i-r}^{d,k}(\mu)). \quad (15)$$

In Figure 7, however, if we add a term  $m_i(\lambda)$  to node  $i$  at label  $\lambda$  via  $m_{ji}(\lambda)$  from node  $j$  to node  $i$  at label  $\lambda$ , the same value should be subtracted along all edges connecting this node  $i$ , that is  $\forall (i, j) \in \mathcal{E}$ , in order to maintain the same Eq. (14) in optimization. This supports the exclusion of  $r^-$  from  $\mathcal{R}$  in Eq. (15). This is important for multiple iterations because the non-zero messages after the 1st iteration, as additional terms, will change the energy function via Eq. (15). Hence, a simple combination of many standard SGMs will change the energy function due to the lack of the subtraction above.

**C Indexing First Nodes by Interpolation**

Tree graphs contain horizontal, vertical, and diagonal (including symmetric, asymmetric wide, and asymmetric narrow) trees, shown in Figure 8. Generally, the horizontal and

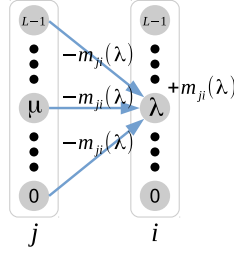

Fig. 7: Energy function maintained in iterative message passing. When adding a term  $m_{ji}(\lambda)$  to node  $i$  at label  $\lambda$ , the same value should be subtracted on all edges connecting node  $i$  at label  $\lambda$ .

vertical trees are for 4-connected graphs, symmetric trees are for 8-connected graphs, and asymmetric trees are for more than 8-connected graphs, resulting in different ways of indexing the first nodes for parallelization. In the following, we denote an image size with height  $H$  and width  $W$ , coordinates of the first node in vertical and horizontal directions as  $p_h$  and  $p_w$  respectively, and scanning steps in vertical and horizontal directions as  $S_h$  and  $S_w$  respectively.

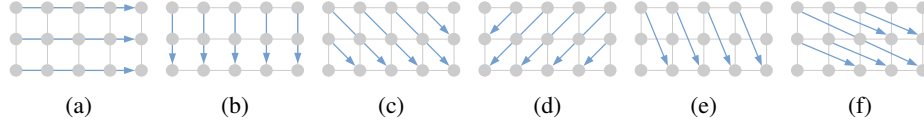

Fig. 8: Multi-direction message passing (forward passing in 6 directions). (a) horizontal trees. (b) vertical trees. (c) symmetric trees from up-left to down-right. (d) symmetric trees from up-right to down-left. (e) asymmetric narrow trees with height and width steps  $S = (S_h, S_w) = (2, 1)$ . (f) asymmetric wide trees with  $S = (1, 2)$ .

**Horizontal and vertical graph trees.** Coordinate of the first node of a horizontal and vertical tree,  $p = (p_h, p_w)$ , can be presented by  $(p_h, 0)$  and  $(0, p_w)$  respectively in the forward pass, and  $(p_h, W - 1)$  and  $(H - 1, p_w)$  respectively in the backward pass.

**Symmetric and asymmetric wide graph trees.** Coordinate of the first node  $p = (p_h, p_w)$  is calculated by

$$\begin{aligned} N &= W + (H - 1) * \text{abs}(S_w) , \\ p_w &= [0 : N - 1] - (H - 1) * \max(S_w, 0) , \\ p_h &= \begin{cases} 0 & \text{if } S_h > 0 , \\ H - 1 & \text{otherwise} , \end{cases} \end{aligned} \quad (16)$$

where  $N$  is tree number,  $\text{abs}(\cdot)$  is absolution, and  $T_s$  is shifted indices of trees.

**Asymmetric narrow graph trees.** Coordinate of the first node  $p$  by interpolation is calculated by

$$\begin{aligned}
c_1 &= \text{mod}(T_s, \text{abs}(S_h)) , \\
c_2 &= \frac{\text{float}(T_s)}{\text{float}(\text{abs}(S_h))} , \\
p_h &= \begin{cases} \text{mod}(\text{abs}(S_h) - c_1, \text{abs}(S_h)) & \text{if } S_w > 0 , \\ c_1 & \text{otherwise} , \end{cases} \\
p_h &= H - 1 - p_h \text{ if } S_h < 0 , \\
p_w &= \begin{cases} \text{ceil}(c_2) & \text{if } S_w > 0 , \\ \text{floor}(c_2) & \text{otherwise} , \end{cases}
\end{aligned} \tag{17}$$

where  $\text{mod}(\ast)$  is modulo,  $\text{floor}(\ast)$  and  $\text{ceil}(\ast)$  are two integer approximations,  $\text{float}(\ast)$  is data conversion for single-precision floating-point values, and the rest share the same notations in Eq. (16).

Although ISGMR and TRWP are parallelized over individual trees, message updates on a tree are sequential. The interpolation for asymmetric diagonals avoids as many redundant scanning as possible, shown in Figure 9. This is more practical for realistic stereo image pairs that the width is much larger than the height.

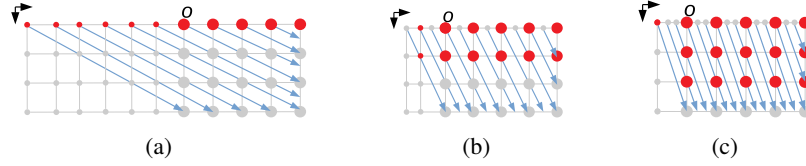

Fig. 9: Interpolation in asymmetric graph trees in forward passing. (a) asymmetric wide trees with steps  $S = (1, 2)$ . (b) asymmetric narrow trees with  $S = (2, 1)$ . (c) asymmetric narrow trees with  $S = (3, 1)$ . Red circles are first nodes of trees; large circles are within image size; small circles are interpolated;  $o$  is axes center. Coordinates of interpolations in (a) are integral; in (b)-(c) round to the nearest integers by Eq. (17).

## D Differentiability of ISGMR

Below, we replace  $m^{r,k}$  by  $m^r$  and  $m^{r,k+1}$  by  $\hat{m}^r$  for simplicity. This is because from the practical implementation, messages in direction  $r$  should be updated instead of allocating new memories in each iteration to avoid GPU memory increase. Thus, we only use two variables  $m^r$  and  $\hat{m}^r$  for messages before and after an iteration.

### D.1 Explicit Representation of Forward Propagation

Since message update in ISGMR relies on recursively updated messages  $\hat{\mathbf{m}}^r$  in each scanning direction  $r$  and messages  $\mathbf{m}^r$  from all the other directions updated in the previous iteration, an explicit ISGMR message update is

$$\hat{m}_i^r(\lambda) = \min_{\mu \in \mathcal{L}} (\theta_{i-r}(\mu) + \theta_{i-r,i}(\mu, \lambda) + \hat{m}_{i-r}^r(\mu) + \sum_{d \in \mathcal{R} \setminus \{r, r^-\}} m_{i-r}^d(\mu)), \quad (18)$$

$$\forall i \in \mathcal{V}, \forall \lambda \in \mathcal{L}, \forall r \in \mathcal{R}.$$

Applying message reparametrization by

$$\hat{m}_i^r(\lambda) = \hat{m}_i^r(\lambda) - \min_{k \in \mathcal{L}} \hat{m}_i^r(k), \quad \forall i \in \mathcal{V}, \forall \lambda \in \mathcal{L}, \forall r \in \mathcal{R}. \quad (19)$$

After updating messages in **all directions within an iteration**, we assign the updated message  $\hat{\mathbf{m}}$  to  $\mathbf{m}$  by

$$m_i(\lambda) = \hat{m}_i(\lambda), \quad \forall i \in \mathcal{V}, \forall \lambda \in \mathcal{L}. \quad (20)$$

Eventually, **after all iterations**, unary potentials and updated messages from all directions will be aggregated by

$$c_i(\lambda) = \theta_i(\lambda) + \sum_{d \in \mathcal{R}} m_i^d(\lambda), \quad \forall i \in \mathcal{V}, \forall \lambda \in \mathcal{L}. \quad (21)$$

Different from optimization with winner-takes-all for labelling in learning by  $\mathbf{x}_i = \text{argmin}_{\lambda \in \mathcal{L}} c_i(\lambda), \forall i \in \mathcal{V}$ , a regression with disparity confidences calculated by the final costs is used to fit with the real-valued ground truth disparities  $\mathbf{g} = \{g_i\}, \forall i \in \mathcal{V}$ . Generally, the disparity confidence  $f_i(\lambda)$  with a normalization such as SoftMin() is represented by

$$f_i(\lambda) = \text{SoftMin}(c_i(\lambda)), \quad \forall i \in \mathcal{V}, \forall \lambda \in \mathcal{L}, \quad (22)$$

and the regression for real-valued disparity  $\mathbf{d} = \{d_i\}, \forall i \in \mathcal{V}$  is

$$d_i = \sum_{\lambda \in \mathcal{L}} \lambda f_i(\lambda), \quad \forall i \in \mathcal{V}. \quad (23)$$

The loss function  $L(\mathbf{d}, \mathbf{g})$  in learning can be standard L1 or smooth L1 loss function.

## D.2 Derivations of Differentiability

Now we do backpropagation at  $k$ th iteration for learnable parameters  $\{\theta_i, \theta_{i,j}\}$ . With the same notations in Section 4 in the main paper,  $\{p_{k,i}^r(\lambda)\}$  and  $\{q_{k,i}^r\}$  are indices stored in the forward propagation from message minimization and reparameterization respectively, and  $\nabla* = dL/d*$ .

### D.2.1 Gradients of unary potentials

**Proposition:** Gradients of unary potentials  $\{\theta_i(\lambda)\}$  are represented by

$$\begin{aligned}
\nabla\theta_i(\lambda) &= \nabla c_i(\lambda) + \sum_{v \in \mathcal{L}} \sum_{r \in \mathcal{R}} \nabla \hat{m}_{i+r}^r(v) \Big|_{\lambda=p_{k,i+r}^r(v)} \\
&= \nabla c_i(\lambda) + \sum_{v \in \mathcal{L}} \sum_{r \in \mathcal{R}} \sum_{\mu \in \mathcal{L}} \left( \nabla \hat{m}_{i+2r}^r(\mu) \Big|_{v=p_{k,i+2r}^r(\mu)} \right. \\
&\quad \left. + \sum_{d \in \mathcal{R} \setminus \{r, r^-\}} \nabla m_{i+r+d}^d(\mu) \Big|_{v=p_{k,i+r+d}^d(\mu)} \right) \Big|_{\lambda=p_{k,i+r}^r(v)} .
\end{aligned} \tag{24}$$

*Derivation:*

The backpropagation from Eq. (23)-Eq. (18) is

$$\begin{aligned}
\nabla\theta_i(\lambda) &= \frac{dL}{d\theta_i(\lambda)} \\
&= \sum_{j \in \mathcal{V}} \sum_{v \in \mathcal{L}} \frac{\partial L}{\partial d_j(v)} \frac{\partial d_j(v)}{\partial f_j(v)} \frac{\partial f_j(v)}{\partial c_j(v)} \frac{\partial c_j(v)}{\partial \theta_i(\lambda)} \quad \triangleright \text{back Eq. (23)-Eq. (22)} \\
&= \sum_{j \in \mathcal{V}} \sum_{v \in \mathcal{L}} \nabla c_j(v) \left( \frac{\partial c_j(v)}{\partial \theta_j(v)} \frac{\partial \theta_j(v)}{\partial \theta_i(\lambda)} + \sum_{r \in \mathcal{R}} \frac{\partial c_j(v)}{\partial m_j^r(v)} \frac{\partial m_j^r(v)}{\partial \theta_i(\lambda)} \right) \quad \triangleright \text{back Eq. (21)} \\
&= \nabla c_i(\lambda) + \sum_{j \in \mathcal{V}} \sum_{v \in \mathcal{L}} \sum_{r \in \mathcal{R}} \nabla m_j^r(v) \frac{\partial m_j^r(v)}{\partial \theta_i(\lambda)} \\
&= \nabla c_i(\lambda) + \sum_{j \in \mathcal{V}} \sum_{v \in \mathcal{L}} \sum_{r \in \mathcal{R}} \nabla m_j^r(v) \frac{\partial m_j^r(v)}{\partial \hat{m}_j^r(v)} \frac{\partial \hat{m}_j^r(v)}{\partial \theta_i(\lambda)} \quad \triangleright \text{back Eq. (20)} \\
&= \nabla c_i(\lambda) + \sum_{j \in \mathcal{V}} \sum_{v \in \mathcal{L}} \sum_{r \in \mathcal{R}} \nabla \hat{m}_j^r(v) \frac{\partial \hat{m}_j^r(v)}{\partial \theta_i(\lambda)} .
\end{aligned} \tag{25}$$

With backpropagation of Eq. (19) using an implicit message reparametrization with index  $v^* = q_{k,j}^r$  at  $k$ th iteration,  $\nabla \hat{m}_j^r(v)$  in the second term above is updated by

$$\nabla \hat{m}_j^r(v) \leftarrow \begin{cases} \nabla \hat{m}_j^r(v) & \text{if } v \neq v^* , \\ -\sum_{v' \in \mathcal{L} \setminus v^*} \nabla \hat{m}_j^r(v') & \text{otherwise} . \end{cases} \tag{26}$$

*Derivation of Eq. (26):*

Explicit representation of Eq. (19) is  $\tilde{m}_i^r(\lambda) = \hat{m}_i^r(\lambda) - \hat{m}_i^r(\lambda^*)$ , where  $\lambda^* = q_{k,i}^r$ , then we have

$$\begin{aligned}
\nabla \hat{m}_i^r(\lambda) &= \frac{\partial L}{\partial \hat{m}_i^r(\lambda)} \\
&= \sum_{i' \in \mathcal{V}} \sum_{\lambda' \in \mathcal{L}} \frac{\partial L}{\partial \tilde{m}_{i'}^r(\lambda')} \frac{\partial \tilde{m}_{i'}^r(\lambda')}{\partial \hat{m}_i^r(\lambda)} \\
&= \sum_{i' \in \mathcal{V}} \sum_{\lambda' \in \mathcal{L}} \frac{\partial L}{\partial \tilde{m}_{i'}^r(\lambda')} \left( \frac{\partial \tilde{m}_{i'}^r(\lambda')}{\partial \hat{m}_i^r(\lambda)} \frac{\partial \hat{m}_{i'}^r(\lambda')}{\partial \hat{m}_i^r(\lambda)} + \frac{\partial \tilde{m}_{i'}^r(\lambda')}{\partial \hat{m}_i^r(\lambda^*)} \frac{\partial \hat{m}_{i'}^r(\lambda^*)}{\partial \hat{m}_i^r(\lambda)} \right) \quad (27) \\
&= \frac{\partial L}{\partial \tilde{m}_i^r(\lambda)} - \sum_{\lambda' \in \mathcal{L}} \frac{\partial L}{\partial \tilde{m}_i^r(\lambda')} \Big|_{\lambda=\lambda^*} \\
&= \begin{cases} \nabla \tilde{m}_i^r(\lambda) & \text{if } \lambda \neq \lambda^*, \\ -\sum_{\lambda' \in \mathcal{L} \setminus \lambda^*} \nabla \tilde{m}_i^r(\lambda') & \text{otherwise.} \end{cases}
\end{aligned}$$

Back to the implicit message reparametrization with  $\nabla \tilde{m}^r$  replaced by  $\nabla \hat{m}^r$ , we have

$$\nabla \hat{m}_i^r(\lambda) = \begin{cases} \nabla \hat{m}_i^r(\lambda) & \text{if } \lambda \neq \lambda^*, \\ -\sum_{\lambda' \in \mathcal{L} \setminus \lambda^*} \nabla \hat{m}_i^r(\lambda') & \text{otherwise.} \end{cases} \quad (28)$$

End of the derivation of Eq. (26).

Next, we continue the backpropagation through Eq. (18) for unary potentials as

$$\begin{aligned}
\nabla \theta_i(\lambda) &= \nabla c_i(\lambda) + \sum_{j \in \mathcal{V}} \sum_{v \in \mathcal{L}} \sum_{r \in \mathcal{R}} \nabla \hat{m}_j^r(v) \frac{\partial \hat{m}_j^r(v)}{\partial \theta_i(\lambda)} \quad \triangleright \text{from Eq. (25)} \\
&= \nabla c_i(\lambda) + \sum_{v \in \mathcal{L}} \sum_{r \in \mathcal{R}} \nabla \hat{m}_{i+r}^r(v) \frac{\partial \hat{m}_{i+r}^r(v)}{\partial \theta_i(\lambda)} \quad \triangleright \text{back Eq. (18) without recursion} \\
&= \nabla c_i(\lambda) + \sum_{v \in \mathcal{L}} \sum_{r \in \mathcal{R}} \nabla \hat{m}_{i+r}^r(v) \Big|_{\lambda=p_{k,i+r}^r(v)} \cdot \quad \triangleright \text{satisfy argmin() rule in Eq. (18)} \\
&\quad (29)
\end{aligned}$$

Derivation of  $\nabla c_i(\lambda)$  by backpropagation from the loss function, disparity regression, and SoftMin(), can be obtained by PyTorch autograd directly. For the readability of derivations by avoiding using  $\{m_{i+r}^r(m_i^r(\theta_{i-r}(\lambda))), m_{i+2r}^r(m_{i+r}^r(m_i^r(\theta_{i-r}(\lambda))))\dots\}$ , we do not write the recursion of gradients in the derivations. Below, we derive  $\nabla \hat{m}_{i+r}^r(v)$  in the backpropagation.

### D.2.2 Gradients of Messages

For notation readability, we first derive message gradient  $\nabla \hat{m}_i^r(\lambda)$  instead of  $\nabla \hat{m}_{i+r}^r(v)$ .

**Proposition:** Gradients of messages  $\{\hat{m}_i^r(\lambda)\}$  are represented by

$$\nabla \hat{m}_i^r(\lambda) = \sum_{v \in \mathcal{L}} \left( \nabla \hat{m}_{i+r}^r(v) \Big|_{\lambda=p_{k,i+r}^r(v)} + \sum_{d \in \mathcal{R} \setminus \{r, r^-\}} \nabla m_{i+d}^d(v) \Big|_{\lambda=p_{k,i+d}^d(v)} \right). \quad (30)$$

*Derivation:*

$$\begin{aligned}
\nabla \hat{m}_i^r(\lambda) &= \frac{dL}{d\hat{m}_i^r(\lambda)} \\
&= \sum_{j \in \mathcal{V}} \sum_{v \in \mathcal{L}} \nabla c_j(v) \frac{\partial c_j(v)}{\partial \hat{m}_i^r(\lambda)} &> \text{back Eq. (23)-Eq. (22)} \\
&= \sum_{j \in \mathcal{V}} \sum_{v \in \mathcal{L}} \nabla c_j(v) \sum_{d \in \mathcal{R}} \frac{\partial c_j(v)}{\partial m_j^d(v)} \frac{\partial m_j^d(v)}{\partial \hat{m}_i^r(\lambda)} &> \text{back Eq. (21)} \\
&= \sum_{j \in \mathcal{V}} \sum_{v \in \mathcal{L}} \nabla c_j(v) \sum_{d \in \mathcal{R}} \frac{\partial c_j(v)}{\partial m_j^d(v)} \frac{\partial m_j^d(v)}{\partial \hat{m}_j^d(v)} \frac{\partial \hat{m}_j^d(v)}{\partial \hat{m}_i^r(\lambda)} &> \text{back Eq. (20)} \\
&= \sum_{j \in \mathcal{V}} \sum_{v \in \mathcal{L}} \sum_{d \in \mathcal{R}} \nabla \hat{m}_j^d(v) \frac{\partial \hat{m}_j^d(v)}{\partial \hat{m}_i^r(\lambda)},
\end{aligned} \tag{31}$$

then we update  $\nabla \hat{m}_j^d(v)$  by Eq. (26) and continue as follows,

$$\begin{aligned}
\nabla \hat{m}_i^r(\lambda) &= \sum_{j \in \mathcal{V}} \sum_{v \in \mathcal{L}} \sum_{d \in \mathcal{R}} \nabla \hat{m}_j^d(v) \frac{\partial \hat{m}_j^d(v)}{\partial \hat{m}_i^r(\lambda)} &> \text{from Eq. (31)} \\
&= \sum_{j \in \mathcal{V}} \sum_{v \in \mathcal{L}} \sum_{d \in \mathcal{R}} \nabla \hat{m}_j^d(v) \left( \sum_{\lambda' \in \mathcal{L}} \frac{\partial \hat{m}_j^d(v)}{\partial \hat{m}_{j-d}^d(\lambda')} \frac{\partial \hat{m}_{j-d}^d(\lambda')}{\partial \hat{m}_i^r(\lambda)} \right. \\
&\quad \left. + \sum_{d' \in \mathcal{R} \setminus \{d, d^-\}} \sum_{\lambda' \in \mathcal{L}} \frac{\partial \hat{m}_j^d(v)}{\partial m_{j-d}^{d'}(\lambda')} \frac{\partial m_{j-d}^{d'}(\lambda')}{\partial \hat{m}_i^r(\lambda)} \right) &> \text{back Eq. (18)} \\
&= \sum_{v \in \mathcal{L}} \left( \nabla \hat{m}_{i+r}^r(v) \Big|_{\lambda=p_{k,i+r}^r(v)} \right. \\
&\quad \left. + \sum_{d \in \mathcal{R}} \sum_{d' \in \mathcal{R} \setminus \{d, d^-\}} \sum_{\lambda' \in \mathcal{L}} \nabla \hat{m}_j^d(v) \frac{\partial \hat{m}_j^d(v)}{\partial m_{j-d}^{d'}(\lambda')} \frac{\partial m_{j-d}^{d'}(\lambda')}{\partial \hat{m}_i^r(\lambda)} \right).
\end{aligned} \tag{32}$$

Since  $m_{j-d}^{d'}(\lambda')$  is differentiable by  $\hat{m}_i^r(\lambda)$  due to Eq. (20) and, for ISGMR, message gradients in directions except the current direction  $r$  come from the next iteration (since in the forward propagation these messages come from the previous iteration), we have



$$\begin{aligned}
\nabla \hat{m}_i^r(\lambda) &= \sum_{v \in \mathcal{L}} \left( \nabla \hat{m}_{i+r}^r(v) \Big|_{\lambda=p_{k,i+r}^r(v)} \right. \\
&\quad \left. + \sum_{d \in \mathcal{R}} \sum_{d' \in \mathcal{R} \setminus \{d, d^-\}} \sum_{\lambda' \in \mathcal{L}} \nabla \hat{m}_j^d(v) \frac{\partial \hat{m}_j^d(v)}{\partial m_{j-d}^{d'}(\lambda')} \frac{\partial m_{j-d}^{d'}(\lambda')}{\partial \hat{m}_i^r(\lambda)} \right) \quad \triangleright \text{from Eq. (32)} \\
&= \sum_{v \in \mathcal{L}} \left( \nabla \hat{m}_{i+r}^r(v) \Big|_{\lambda=p_{k,i+r}^r(v)} \right. \\
&\quad \left. + \sum_{d \in \mathcal{R}} \nabla \hat{m}_{i+d}^d(v) \frac{\partial \hat{m}_{i+d}^d(v)}{\partial m_i^r(\lambda)} \frac{\partial m_i^r(\lambda)}{\partial \hat{m}_i^r(\lambda)} \Big|_{r \notin \{d, d^-\}} \right) \quad \triangleright \text{due to Eq. (20)} \\
&= \sum_{v \in \mathcal{L}} \left( \nabla \hat{m}_{i+r}^r(v) \Big|_{\lambda=p_{k,i+r}^r(v)} \right. \\
&\quad \left. + \sum_{d \in \mathcal{R} \setminus \{r, r^-\}} \nabla m_{i+d}^d(v) \Big|_{\lambda=p_{k,i+d}^d(v)} \right). \tag{33}
\end{aligned}$$

Here, updating the message gradient at node  $i$  depends on its next node  $i + r$  along the scanning direction  $r$ ; this scanning direction is opposite to the forward scanning direction, and thus, it depends on node  $i + r$  instead of  $i - r$ . Gradient of message  $m_i^r(\lambda)$  can be derived in the same way.

Now one can derive  $\nabla \hat{m}_{i+r}^r(v)$  in the same manner of  $\nabla \hat{m}_i^r(\lambda)$  and apply it to Eq. (29) to obtain Eq. (24).

### D.2.3 Gradient of Pairwise Potentials

**Proposition:** Gradients of pairwise potentials  $\{\theta_{i-r,i}(\mu, \lambda)\}$  are represented by

$$\nabla \theta_{i-r,i}(\mu, \lambda) = \nabla \hat{m}_i^r(\lambda) \Big|_{\mu=p_{k,i}^r(\lambda)}, \quad \forall i \in \mathcal{V}, \forall r \in \mathcal{R}, \forall \lambda, \mu \in \mathcal{L}. \tag{34}$$

*Derivation:*

$$\begin{aligned}
\nabla \theta_{i-r,i}(\mu, \lambda) &= \frac{dL}{d\theta_{i-r,i}(\mu, \lambda)} \\
&= \sum_{j \in \mathcal{V}} \sum_{v \in \mathcal{L}} \nabla c_j(v) \frac{\partial c_j(v)}{\partial \theta_{i-r,i}(\mu, \lambda)} \quad \triangleright \text{back Eq. (23)-Eq. (22)} \\
&= \sum_{j \in \mathcal{V}} \sum_{v \in \mathcal{L}} \nabla c_j(v) \sum_{d \in \mathcal{R}} \frac{\partial c_j(v)}{\partial m_j^d(v)} \frac{\partial m_j^d(v)}{\partial \theta_{i-r,i}(\mu, \lambda)} \quad \triangleright \text{back Eq. (21)} \\
&= \sum_{j \in \mathcal{V}} \sum_{v \in \mathcal{L}} \sum_{d \in \mathcal{R}} \nabla c_j(v) \frac{\partial c_j(v)}{\partial m_j^d(v)} \frac{\partial m_j^d(v)}{\partial \hat{m}_j^d(v)} \frac{\partial \hat{m}_j^d(v)}{\partial \theta_{i-r,i}(\mu, \lambda)} \quad \triangleright \text{back Eq. (20)} \\
&= \sum_{j \in \mathcal{V}} \sum_{v \in \mathcal{L}} \sum_{d \in \mathcal{R}} \nabla \hat{m}_j^d(v) \frac{\partial \hat{m}_j^d(v)}{\partial \theta_{i-r,i}(\mu, \lambda)}. \tag{35}
\end{aligned}$$

Now we update  $\nabla \hat{m}_j^d(v)$  by Eq. (26). Then

$$\begin{aligned}\nabla \theta_{i-r,i}(\mu, \lambda) &= \sum_{j \in \mathcal{V}} \sum_{v \in \mathcal{L}} \sum_{d \in \mathcal{R}} \nabla \hat{m}_j^d(v) \frac{\partial \hat{m}_j^d(v)}{\partial \theta_{i-r,i}(\mu, \lambda)} &> \text{from Eq. (35)} \\ &= \nabla \hat{m}_i^r(\lambda) \big|_{\mu=p_{k,i}^r(\lambda)} . &> \text{back Eq. (18) without recursion}\end{aligned}\tag{36}$$

One can note that the memory requirement of  $\{\theta_{i-r,i}(\mu, \lambda)\}$  is  $4 \sum_{r \in \mathcal{R}} |\mathcal{E}^r| |\mathcal{L}| |\mathcal{L}|$  bytes using single-precision floating-point values. This will be high when the number of disparities  $|\mathcal{L}|$  is large. In practical, since the pairwise potentials can be decomposed by  $\theta_{i,j}(\lambda, \mu) = \theta_{i,j} V(\lambda, \mu), \forall (i, j) \in \mathcal{E}, \forall \lambda, \mu \in \mathcal{L}$  with edge weights  $\theta_{i,j}$  and a pairwise function  $V(\cdot, \cdot)$ , it takes up  $4(\sum_{r \in \mathcal{R}} |\mathcal{E}^r| + |\mathcal{L}| |\mathcal{L}|)$  bytes in total, which is much less than  $4 \sum_{r \in \mathcal{R}} |\mathcal{E}^r| |\mathcal{L}| |\mathcal{L}|$  above. Therefore, we additionally provide the gradient derivations of these two terms, edge weights and pairwise functions, for practical implementations of the backpropagation.

#### D.2.4 Gradient of Edge Weights

**Proposition:** Gradients of edge weights  $\{\theta_{i-r,i}\}$  are represented by

$$\nabla \theta_{i-r,i} = \sum_{v \in \mathcal{L}} \nabla \hat{m}_i^r(v) V(p_{k,i}^r(v), v), \quad \forall i \in \mathcal{V}, \forall r \in \mathcal{R} . \tag{37}$$

*Derivation:*

$$\begin{aligned}\nabla \theta_{i-r,i} &= \frac{dL}{d\theta_{i-r,i}} \\ &= \sum_{j \in \mathcal{V}} \sum_{v \in \mathcal{L}} \nabla c_j(v) \frac{\partial c_j(v)}{\partial \theta_{i-r,i}} &> \text{back Eq. (23)-Eq. (22)} \\ &= \sum_{j \in \mathcal{V}} \sum_{v \in \mathcal{L}} \nabla c_j(v) \sum_{d \in \mathcal{R}} \frac{\partial c_j(v)}{\partial m_j^d(v)} \frac{\partial m_j^d(v)}{\partial \theta_{i-r,i}} &> \text{back Eq. (21)} \\ &= \sum_{j \in \mathcal{V}} \sum_{v \in \mathcal{L}} \sum_{d \in \mathcal{R}} \nabla c_j(v) \frac{\partial c_j(v)}{\partial m_j^d(v)} \frac{\partial m_j^d(v)}{\partial \hat{m}_j^d(v)} \frac{\partial \hat{m}_j^d(v)}{\partial \theta_{i-r,i}} &> \text{back Eq. (20)} \\ &= \sum_{j \in \mathcal{V}} \sum_{v \in \mathcal{L}} \sum_{d \in \mathcal{R}} \nabla \hat{m}_j^d(v) \frac{\partial \hat{m}_j^d(v)}{\partial \theta_{i-r,i}} .\end{aligned}\tag{38}$$

Again, before updating gradients of edge weights by Eq. (18),  $\nabla \hat{m}_j^d(v)$  is updated by Eq. (26). Then

$$\begin{aligned}
\nabla \theta_{i-r,i} &= \sum_{j \in \mathcal{V}} \sum_{v \in \mathcal{L}} \sum_{d \in \mathcal{R}} \nabla \hat{m}_j^d(v) \frac{\partial \hat{m}_j^d(v)}{\partial \theta_{i-r,i}} &> \text{from Eq. (38)} \\
&= \sum_{j \in \mathcal{V}} \sum_{v \in \mathcal{L}} \sum_{d \in \mathcal{R}} \nabla \hat{m}_j^d(v) \frac{\partial \hat{m}_j^d(v)}{\partial \theta_{j-d,j}} V(p_{k,j}^d(v), v) \frac{\partial \theta_{j-d,j}}{\partial \theta_{i-r,i}} &> \text{back Eq. (18), no recursion} \\
&= \sum_{v \in \mathcal{L}} \nabla \hat{m}_i^r(v) V(p_{k,i}^r(v), v) .
\end{aligned} \tag{39}$$

In the case that when edge weights are undirected, *i.e.*,  $\theta_{i,j} = \theta_{j,i}$ , the derivations above still hold, and if  $\theta_{i,j} = \theta_{j,i}$  are stored in the same tensor,  $\nabla \theta_{i,j}$  will be accumulated by adding  $\nabla \theta_{j,i}$  for storing the gradient of this edge weight. This is also applied to the gradient of pairwise potentials in Eq. (34) above.

### D.2.5 Gradients of Pairwise Functions

**Proposition:** Gradients of a pairwise function  $V(\cdot, \cdot)$  are

$$\nabla V(\lambda, \mu) = \sum_{j \in \mathcal{V}} \sum_{r \in \mathcal{R}} \theta_{j-r,j} \nabla \hat{m}_j^r(\mu) \Big|_{\lambda=p_{k,j}^r(\mu)}, \quad \forall \lambda, \mu \in \mathcal{L} . \tag{40}$$

*Derivation:*

$$\begin{aligned}
\nabla V(\lambda, \mu) &= \frac{dL}{dV(\lambda, \mu)} \\
&= \sum_{j \in \mathcal{V}} \sum_{v \in \mathcal{L}} \nabla c_j(v) \frac{\partial c_j(v)}{\partial V(\lambda, \mu)} &> \text{back Eq. (23)-Eq. (22)} \\
&= \sum_{j \in \mathcal{V}} \sum_{v \in \mathcal{L}} \nabla c_j(v) \sum_{r \in \mathcal{R}} \frac{\partial c_j(v)}{\partial m_j^r(v)} \frac{\partial m_j^r(v)}{\partial V(\lambda, \mu)} &> \text{back Eq. (21)} \\
&= \sum_{j \in \mathcal{V}} \sum_{v \in \mathcal{L}} \sum_{r \in \mathcal{R}} \nabla c_j(v) \frac{\partial c_j(v)}{\partial m_j^r(v)} \frac{\partial m_j^r(v)}{\partial \hat{m}_j^r(v)} \frac{\partial \hat{m}_j^r(v)}{\partial V(\lambda, \mu)} &> \text{back Eq. (20)} \\
&= \sum_{j \in \mathcal{V}} \sum_{v \in \mathcal{L}} \sum_{r \in \mathcal{R}} \nabla \hat{m}_j^r(v) \frac{\partial \hat{m}_j^r(v)}{\partial V(\lambda, \mu)} .
\end{aligned} \tag{41}$$

$\nabla \hat{m}_j^r(v)$  is updated by Eq. (26). Then

$$\begin{aligned}
\nabla V(\lambda, \mu) &= \sum_{j \in \mathcal{V}} \sum_{v \in \mathcal{L}} \sum_{r \in \mathcal{R}} \nabla \hat{m}_j^r(v) \frac{\partial \hat{m}_j^r(v)}{\partial V(\lambda, \mu)} &> \text{from Eq. (41)} \\
&= \sum_{j \in \mathcal{V}} \sum_{v \in \mathcal{L}} \sum_{r \in \mathcal{R}} \nabla \hat{m}_j^r(v) \sum_{\lambda' \in \mathcal{L}} \frac{\partial \hat{m}_j^r(v)}{\partial V(\lambda', v)} \frac{\partial V(\lambda', v)}{\partial V(\lambda, \mu)} &> \text{from Eq. (18)} \quad (42) \\
&= \sum_{j \in \mathcal{V}} \sum_{r \in \mathcal{R}} \theta_{j-r, j} \nabla \hat{m}_j^r(\mu) \Big|_{\lambda=p_{k, j}^r(\mu)} .
\end{aligned}$$

### D.3 Characteristics of Backpropagation

**1. Accumulation.** Since a message update usually has several components, its gradient is therefore accumulated when backpropagating through every component. For instance, in Eq. (29), the gradient of unary potential  $\nabla \theta_i(\lambda)$  has  $\nabla c_i(\lambda)$  and  $\nabla \hat{m}_{i+r}^r(v)$ ,  $\forall r \in \mathcal{R}$  and  $\forall v$  satisfying  $\lambda = p_{k, i+r}^r(v)$  at  $k$ th iteration. It is calculated recursively but not at once due to multiple nodes on a tree, multiple directions, and multiple iterations. In Eq. (33), the message gradient of a node relies on the gradient of all nodes after it in the forward propagation since this message will be used to all the message updates after this node.

**2. Zero Out Gradients.** Message gradients are not accumulated throughout the backpropagation but should be zeroed out in some cases. In more details, in the forward propagation, the repeated usage of  $\mathbf{m}^r$  and  $\hat{\mathbf{m}}^r$  is for all iterations but the messages are, in fact, new variables whenever they are updated. Since the gradient of a new message must be initialized to 0, zeroing out the gradients of the new messages is important. Specifically, in ISGMR that within an iteration  $\mathbf{m}^r \leftarrow \hat{\mathbf{m}}^r$  is executed only when message updates in all directions are done. Thus,  $\nabla \mathbf{m}^r$  must be zeroed out after  $\nabla \hat{\mathbf{m}}^r \leftarrow \nabla \mathbf{m}^r$ . Similarly, after using  $\nabla \hat{\mathbf{m}}^r$  to update the gradients of learnable parameters and messages,  $\nabla \hat{\mathbf{m}}^r \leftarrow 0, \forall r \in \mathcal{R}$ .

### D.4 PyTorch GPU version vs. our CUDA version

For the compared PyTorch GPU version, we highly paralleled individual trees in each direction while sequential message updates in each tree (equally scanline) are iterative. As Pytorch auto-grad is not customized for our min-sum message passing algorithms, these iterative message updates require to allocate new GPU memory for each updated message, which makes it very inefficient and memory-consuming. Its backpropagation is slower since extra memory is needed to unroll the forward message passing to compute gradients of messages and all intermediate variables that require gradients.

In contrast, our implementation is specific to the min-sum message passing. This min-sum form greatly accelerates our backpropagation by updating gradients only related to the indices which are stored in pre-allocated GPU memory during forward pass (line 10 in Alg. 1). For example, from node  $i$  to  $i+r$  in Fig. 2(a), forward pass needs messages over 9 edges (grey lines); but only one (1 of 3 blue lines) from  $i+r$  to  $i$  requires gradient updates in the backpropagation. This makes our CUDA implementation

much faster than the PyTorch GPU version, especially the backpropagation with at least  $700\times$  speed-up.

## E Computational Complexity of Min-Sum & Sum-Product TRW

Given a graph with parameters  $\{\theta_i, \theta_{i,j}\}$ , maximum iteration  $K$ , set of edges  $\{\mathcal{E}^r\}$ , disparities  $\mathcal{L}$ , directions  $\mathcal{R}$ , computational complexities of min-sum and sum-product TRW are shown below. For the efficient implementation, let  $\theta_{i,j}(\lambda, \mu) = \theta_{i,j} V(\lambda, \mu)$ .

### E.1 Computational Complexity of Min-Sum TRW

Representation of a message update in min-sum TRW is

$$m_i^r(\lambda) = \min_{\mu \in \mathcal{L}} \left( \rho_{i-r,i}(\theta_{i-r}(\mu) + \sum_{d \in \mathcal{R}} m_{i-r}^d(\mu)) - m_{i-r}^{r-}(\mu) + \theta_{i-r,i} V(\mu, \lambda) \right). \quad (43)$$

In our case where the maximum disparity is less than 256, memory for the back-propagation of the min-sum TRW above is only for indices  $\mu^* = p_{k,i}^r(\lambda) \in \mathcal{L}$  from message minimization with  $K \sum_{r \in \mathcal{R}} |\mathcal{E}^r| |\mathcal{L}|$  bytes 8-bit unsigned integer values, as well as for indices from message reparametrization with  $K \sum_{r \in \mathcal{R}} |\mathcal{E}^r|$  bytes. In total, the min-sum TRW needs  $K \sum_{r \in \mathcal{R}} |\mathcal{E}^r| (|\mathcal{L}| + 1)$  bytes for the backpropagation.

### E.2 Computational Complexity of Sum-Product TRW

Representation of a message update in sum-product TRW is

$$\begin{aligned} \exp(-m_i^r(\lambda)) &= \sum_{\mu \in \mathcal{L}} \exp \left( -\rho_{i-r,i}(\theta_{i-r}(\mu) + \sum_{d \in \mathcal{R}} m_{i-r}^d(\mu)) + m_{i-r}^{r-}(\mu) \right. \\ &\quad \left. - \theta_{i-r,i} V(\mu, \lambda) \right) \\ &= \sum_{\mu \in \mathcal{L}} \left( \exp(-\rho_{i-r,i} \theta_{i-r}(\mu)) \prod_{d \in \mathcal{R}} \exp(-\rho_{i-r,i} m_{i-r}^d(\mu)) \right. \\ &\quad \left. \exp(m_{i-r}^{r-}(\mu)) \exp(-\theta_{i-r,i} V(\mu, \lambda)) \right). \end{aligned} \quad (44)$$

Usually, it can be represented as

$$\tilde{m}_i^r(\lambda) = \sum_{\mu \in \mathcal{L}} \left( \exp^{-\rho_{i-r,i} \frac{\theta_{i-r}(\mu)}{1}} \prod_{d \in \mathcal{R}} (\tilde{m}_{i-r}^d(\mu))_2^{\rho_{i-r,i}} \frac{1}{\tilde{m}_{i-r}^{r-}(\mu)}_3 \exp^{-\theta_{i-r,i} \frac{V(\mu, \lambda)}{5}} \right). \quad (45)$$

**Problem 1: Numerical Overflow:** For single-precision floating-point data, a valid numerical range of  $x$  in  $\exp(x)$  is less than around 88.7229; otherwise, it will be infinite. Therefore, for the exponential index in Eq. (44), a numerical overflow will happen quite easily. One solution is to reparametrize these messages to a small range, such as  $[0, 1]$ ,

in the same manner as SoftMax(), which requires logarithm to find the maximum index, followed by exponential operations.

**Problem 2: Low efficiency OR high memory requirement in backpropagation:** In the backpropagation, due to the factorization in Eq. (45), it needs to rerun the forward propagation to calculate intermediate values OR store all these values in the forward propagation. However, the former makes the backpropagation at least as slow as the forward propagation while the later requires a large memory,

$K \sum_{r \in \mathcal{R}} |\mathcal{E}^r| |\mathcal{L}| (8|\mathcal{L}| + 4|\mathcal{R}||\mathcal{L}| + 4)$  bytes single-precision floating-point values.

*Derivation:*

For one message update in Eq. (45), the gradient calculation of terms 1,2-3,4,5 (underlined) requires  $4 \times \{|\mathcal{L}|, |\mathcal{R}||\mathcal{L}|, 1, |\mathcal{L}|\}$  bytes respectively. For  $K$  iterations, set of directions  $\mathcal{R}$ , edges  $\{\mathcal{E}^r\}$ ,  $\forall r \in \mathcal{R}$ , it requires  $K \sum_{r \in \mathcal{R}} |\mathcal{E}^r| |\mathcal{L}| (8|\mathcal{L}| + 4|\mathcal{R}||\mathcal{L}| + 4)$  bytes in total. This is in  $\mathcal{O}(|\mathcal{R}||\mathcal{L}|)$  order higher than the memory requirement in the min-sum TRW memory requirement,  $K \sum_{r \in \mathcal{R}} |\mathcal{E}^r| (|\mathcal{L}| + 1)$  bytes.

## F Additional Evaluations

### F.1 More Evaluations with Constant Edge Weights

More results from the main experiments are given in Tables 6-7.

Table 6: Energy minimization on Middlebury with constant edge weights. For Map, ISGMR-4 has the lowest energy among ISGMR-related methods; for others, ISGMR-8 and TRWP-4 have the lowest energies in ISGMR-related and TRWP-related methods respectively. ISGMR is more effective than SGM in optimization, and TRWP-4 outperforms MF and SGM.

| Method          | Tsukuba |               | Teddy   |                | Venus     |                | Cones   |                | Map     |               |
|-----------------|---------|---------------|---------|----------------|-----------|----------------|---------|----------------|---------|---------------|
|                 | 1 iter  | 50 iter       | 1 iter  | 50 iter        | 1 iter    | 50 iter        | 1 iter  | 50 iter        | 1 iter  | 50 iter       |
| MF-4            | 3121704 | 1620524       | 3206347 | 2583784        | 108494928 | 14618819       | 9686122 | 6379392        | 1116641 | 363221        |
| SGM-4           | 873777  | 644840        | 2825535 | 2559016        | 5119933   | 2637164        | 3697880 | 3170715        | 255054  | 216713        |
| TRWS-4          | 352178  | <u>314393</u> | 1855625 | <u>1807423</u> | 1325651   | <u>1219774</u> | 2415087 | <u>2329324</u> | 150853  | <u>143197</u> |
| ISGMR-4 (ours)  | 824694  | 637996        | 2626648 | 1898641        | 4595032   | 1964032        | 3296594 | 2473646        | 215875  | 148049        |
| TRWP-4 (ours)   | 869363  | <u>314037</u> | 2234163 | <u>1806990</u> | 32896024  | <u>1292619</u> | 3284868 | <u>2329343</u> | 192200  | <u>143364</u> |
| MF-8            | 2322139 | 504815        | 3244710 | 2545226        | 68718520  | 2920117        | 7762269 | 3553975        | 840615  | 213827        |
| SGM-8           | 776706  | 574758        | 2868131 | 2728682        | 4651016   | 2559933        | 3631020 | 3309643        | 243058  | 222678        |
| ISGMR-8 (ours)  | 684185  | <u>340347</u> | 2532071 | <u>1847833</u> | 4062167   | <u>1285330</u> | 3039638 | <u>2398060</u> | 195718  | <u>149857</u> |
| TRWP-8 (ours)   | 496727  | <u>348447</u> | 1981582 | <u>1849287</u> | 8736569   | <u>1347060</u> | 2654033 | <u>2396257</u> | 162432  | <u>151970</u> |
| MF-16           | 1979155 | 404404        | 3315900 | 2622047        | 43077872  | 1981096        | 6741127 | 3062965        | 638753  | 204737        |
| SGM-16          | 710727  | 587376        | 2907051 | 2846133        | 4081905   | 2720669        | 3564423 | 3413752        | 242932  | 232875        |
| ISGMR-16 (ours) | 591554  | <u>377427</u> | 2453592 | <u>1956343</u> | 3222851   | <u>1396914</u> | 2866149 | <u>2595487</u> | 190847  | <u>165249</u> |
| TRWP-16 (ours)  | 402033  | <u>396036</u> | 1935791 | <u>1976839</u> | 2636413   | <u>1486880</u> | 2524566 | <u>2660964</u> | 162655  | <u>164704</u> |

### F.2 More Visualizations for Image Denoising

We provide more visualizations of image denoising on ‘‘Penguin’’ and ‘‘House’’ in Figures 10-11 corresponding to Table 2 in the main paper.

Table 7: Energy minimization on 3 image pairs of KITTI2015 and 2 of ETH-3D with constant edge weights. ISGMR is more effective than SGM in optimization in both single and multiple iterations, and TRWP-4 outperforms MF and SGM.

| Method          | 000002_11 |          | 000041_10 |          | 000119_10 |          | delivery_area_11 |         | facade_1s |         |
|-----------------|-----------|----------|-----------|----------|-----------|----------|------------------|---------|-----------|---------|
|                 | 1 iter    | 50 iter  | 1 iter    | 50 iter  | 1 iter    | 50 iter  | 1 iter           | 50 iter | 1 iter    | 50 iter |
| MF-4            | 82523536  | 44410056 | 69894016  | 36163508 | 72659040  | 42392548 | 19945352         | 9013862 | 13299859  | 6681882 |
| SGM-4           | 24343250  | 18060026 | 15926416  | 12141643 | 24999424  | 18595020 | 5851489          | 4267990 | 1797314   | 1429254 |
| TRWS-4          | 9109976   | 8322635  | 6876291   | 6491169  | 10811576  | 9669367  | 1628879          | 1534961 | 891282    | 851273  |
| ISGMR-4 (ours)  | 22259606  | 12659612 | 14434318  | 9984545  | 23180608  | 18541970 | 5282024          | 2212106 | 1572377   | 980151  |
| TRWP-4 (ours)   | 40473776  | 8385450  | 30399548  | 6528642  | 36873904  | 9765540  | 9899787          | 1546795 | 2851700   | 854552  |
| MF-8            | 61157072  | 18416536 | 53302252  | 16473121 | 57201868  | 21320892 | 16581587         | 4510834 | 10978978  | 3422296 |
| SGM-8           | 20324684  | 16406781 | 13740635  | 11671740 | 20771096  | 16652122 | 5396353          | 4428411 | 1717285   | 1464208 |
| ISGMR-8 (ours)  | 17489158  | 8753990  | 11802603  | 6639570  | 18411930  | 10173513 | 4474404          | 1571528 | 1438210   | 884241  |
| TRWP-8 (ours)   | 18424062  | 8860552  | 13319964  | 6678844  | 20581640  | 10445172 | 4443931          | 1587917 | 1358270   | 889907  |
| MF-16           | 46614232  | 14192750 | 40838292  | 12974839 | 44706364  | 16708809 | 13223338         | 3229021 | 9189592   | 2631006 |
| SGM-16          | 18893122  | 16791762 | 13252150  | 12162330 | 19284684  | 16936852 | 5092094          | 4611821 | 1670997   | 1535778 |
| ISGMR-16 (ours) | 15455787  | 9556611  | 10731068  | 6806150  | 16608803  | 11037483 | 3689863          | 1594877 | 1324235   | 937102  |
| TRWP-16 (ours)  | 11239113  | 9736704  | 8187380   | 6895937  | 13602307  | 11309673 | 2261402          | 1630973 | 1000985   | 950607  |

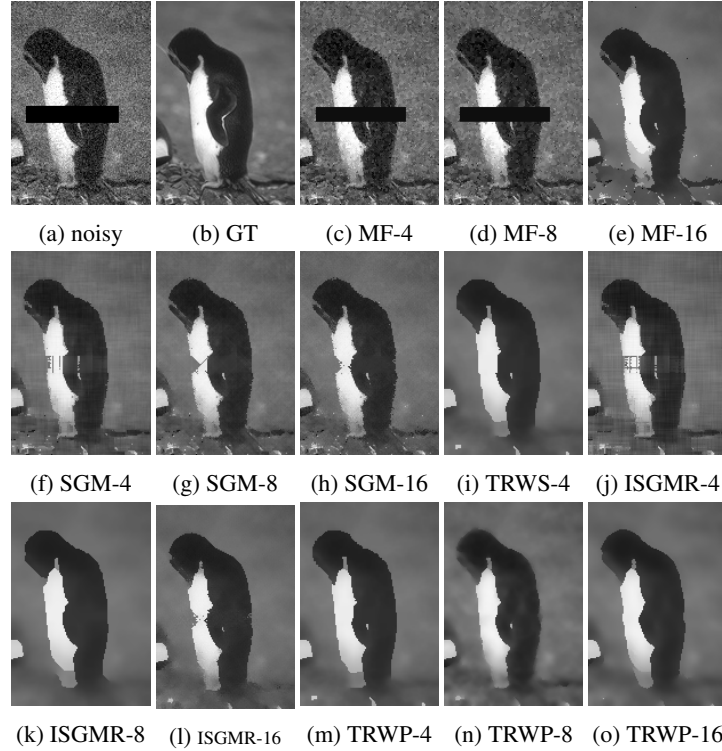

Fig. 10: Visualization of MRF inferences for image denoising on “Penguin”.

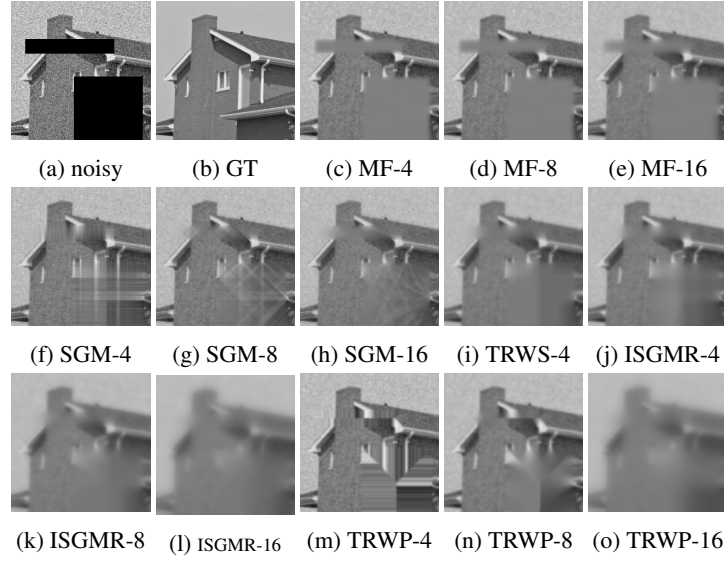

Fig. 11: Visualization of MRF inferences for image denoising on “House”.
